# Supplementary material for: Efficacy of Savolitinib vs Sunitinib in Patients With MET-Driven Papillary Renal Cell Carcinoma: The SAVOIR Phase 3 Randomized Clinical Trial
Source: PubMed Central journal article supplement — JAMA Oncol. 2020 May 29;6(8):1–9. doi: 10.1001/jamaoncol.2020.2218 (PMC7260692; doi:10.1001/jamaoncol.2020.2218), 2020-05-29
Supplement: jamaoncol-6-1247-s004.pdf [file jamaoncol-6-1247-s004.pdf]

## Data Sharing Statement

Choueiri. Efficacy of Savolitinib vs Sunitinib in Patients With MET-Driven Papillary Renal Cell Carcinoma. *JAMA Oncol*. Published May 29, 2020. 10.1001/jamaoncol.2020.2218

### Data

**Data available:** Yes

**Data types:** Other (please specify)

**Additional Information:** Data underlying the findings described in this article may be obtained in accordance with AstraZeneca's data sharing policy.

### How to access

**data:** <https://astrazenecagrouptrials.pharmacm.com/ST/Submission/Disclosure>

**When available:** With publication

### Supporting Documents

**Document types:** None

### Additional Information

**Who can access the data:** Researchers who request through the AstraZeneca Data Request Portal

**Types of analyses:** Determined on a case-by-case basis

**Mechanisms of data availability:** After approval by an independent Scientific Review Board
